# Supplementary material for: Characterization of a non-sexual population of Strongyloides stercoralis with hybrid 18S rDNA haplotypes in Guangxi, Southern China
Source: PLoS Negl Trop Dis. 2019 May 6;13(5):e0007396. doi: 10.1371/journal.pntd.0007396 (PMC6522072; doi:10.1371/journal.pntd.0007396)
Supplement: S4 File — The table shows the sample ID, host ID, country, sex, the mean coverage, the fraction of the genome beyond 15x coverage, the origin of the sequences, and the accession number of individual S. stercoralis used for the whole genome analysis. (XLSX) [file pntd.0007396.s004.xlsx]

## Sheet: Sheet1
Sample ID	Host ID	Country	Sex	Mean coverage	%genome>15x	Sequences obtained from	Accession number
Cn-160	QX105	China	female	2.9565	2.06	this study	PRJNA517237
Cn-197	QX24	China	female	9.1839	18.96	this study	PRJNA517237
Cn-205	QX105	China	male	61.7521	95.08	this study	PRJNA517237
Cn-206	QX105	China	female	15.1766	37.77	this study	PRJNA517237
Cn-209	QX105	China	female	8.8979	12.16	this study	PRJNA517237
Cn-210	QX105	China	female	7.2534	7.22	this study	PRJNA517237
Cn-323	QX24	China	female	73.357	97.96	this study	PRJNA517237
Cn-337	QX24	China	female	21.0492	66.84	this study	PRJNA517237
Cn-338	QX24	China	female	19.4537	62.62	this study	PRJNA517237
Cn-339	QX24	China	female	16.2916	49.92	this study	PRJNA517237
Cn-340	QX24	China	female	26.5378	79.31	this study	PRJNA517237
Cn-356	QX121	China	female	4.123	2.31	this study	PRJNA517237
Cn-374	QX97	China	male	115.83	97.65	this study	PRJNA517237
Cn-377	QX97	China	female	67.1858	81.28	this study	PRJNA517237
Cn-379	QX97	China	female	38.8678	93.19	this study	PRJNA517237
Cn-380	QX97	China	female	3.1952	1.71	this study	PRJNA517237
Cn-381	QX97	China	female	18.226	57.7	this study	PRJNA517237
Cn-390	QX87	China	female	2.3584	1.81	this study	PRJNA517237
Cn-431	QX87	China	male	149.192	98.78	this study	PRJNA517237
Cn-438	Patient A	China	female	76.132	98.74	this study	PRJNA517237
Cn-441	Patient A	China	female	88.5881	99.1	this study	PRJNA517237
Cn-447	Patient B	China	female	84.6366	99.05	this study	PRJNA517237
Cn-468	QX14	China	female	5.7115	7.39	this study	PRJNA517237
Cn-469	QX14	China	female	6.804	6.22	this study	PRJNA517237
Cn-494	QX32	China	female	8.2336	17.15	this study	PRJNA517237
Cn-496	QX32	China	female	13.5451	34.17	this study	PRJNA517237
Cn-497	QX32	China	female	6.8673	5.89	this study	PRJNA517237
Cn-498	QX32	China	female	5.5788	4.54	this study	PRJNA517237
Cn-567	Patient B	China	female	43.4425	93.12	this study	PRJNA517237
Kh-3	KP55	Cambodia	male	39.9651	55.8	2017 Jaleta et al.	PRJEB20999
Kh-4	DC69	Cambodia	male	107.313	76.42	2017 Jaleta et al.	PRJEB20999
Kh-7	KP30 D1	Cambodia	male	43.8045	62.21	2017 Jaleta et al.	PRJEB20999
Kh-8	DC79 D4	Cambodia	male	101.279	87.81	2017 Jaleta et al.	PRJEB20999
Kh-10	KP57	Cambodia	male	85.0146	65.02	2017 Jaleta et al.	PRJEB20999
Kh-11	DC62	Cambodia	male	139.85	83.5	2017 Jaleta et al.	PRJEB20999
Kh-12	KP89	Cambodia	male	144.901	87.69	2017 Jaleta et al.	PRJEB20999
Kh-13	DC108	Cambodia	male	142.552	86.88	2017 Jaleta et al.	PRJEB20999
Kh-16	DC79 D3	Cambodia	male	119.181	85.36	2017 Jaleta et al.	PRJEB20999
Kh-17	KP52 D2	Cambodia	male	55.1913	67.99	2017 Jaleta et al.	PRJEB20999
Kh-18	DC79 D2	Cambodia	male	156.61	85.13	2017 Jaleta et al.	PRJEB20999
Kh-19	KP57	Cambodia	male	109.847	79.58	2017 Jaleta et al.	PRJEB20999
Kh-20	DC51	Cambodia	male	71.3658	78.86	2017 Jaleta et al.	PRJEB20999
Kh-21	DC79 D2	Cambodia	male	171.386	90.56	2017 Jaleta et al.	PRJEB20999
Kh-22	KP30 D1	Cambodia	male	115.684	90.27	2017 Jaleta et al.	PRJEB20999
Kh-23	DC70	Cambodia	male	201.652	92.29	2017 Jaleta et al.	PRJEB20999
Kh-24	KP30	Cambodia	male	80.5992	78.53	2017 Jaleta et al.	PRJEB20999
Kh-26	KP57	Cambodia	male	70.7119	82.75	2017 Jaleta et al.	PRJEB20999
Kh-27	DC51	Cambodia	female	177.776	99.05	this study	PRJNA517237
Kh-28	DC51	Cambodia	female	152.331	84.02	this study	PRJNA517237
Kh-29	DC51	Cambodia	male	78.1526	97.17	this study	PRJNA517237
Kh-30	DC51	Cambodia	male	93.1164	98.4	this study	PRJNA517237
Kh-31	DC69	Cambodia	male	97.7235	98.39	this study	PRJNA517237
Kh-32	DC69	Cambodia	male	125.231	98.8	this study	PRJNA517237
Kh-33	DC69	Cambodia	male	115.391	98.78	this study	PRJNA517237
MyHTB10-5	MyHTB10	Myanmar	unknown	47.7303	92.72	2016 Kikuchi et al.	PRJDB5112
MyHTB122-2	MyHTB122	Myanmar	unknown	48.3224	90.05	2016 Kikuchi et al.	PRJDB5112
MyHTB177-5	MyHTB177	Myanmar	unknown	39.8057	84.58	2016 Kikuchi et al.	PRJDB5112
Rk4-1	Rk4	Japan	unknown	44.3422	89.12	2016 Kikuchi et al.	PRJDB5112
Rk7-1	Rk7	Japan	unknown	43.9176	87.4	2016 Kikuchi et al.	PRJDB5112
Rk9-11	Rk9	Japan	unknown	61.4802	94.03	2016 Kikuchi et al.	PRJDB5112
Rk9-6	Rk9	Japan	unknown	46.2735	90.29	2016 Kikuchi et al.	PRJDB5112
Ref-1		USA-Reference	female	91.3592	99.54	2016 Hunt et al.	PRJEB2398
Ref-2		USA-Reference	female	91.2238	99.54	2016 Hunt et al.	PRJEB2398
Ref-3		USA-Reference	male	99.7328	99.49	2016 Hunt et al.	PRJEB2398
Ref-4		USA-Reference	male	99.206	99.5	2016 Hunt et al.	PRJEB2398
